# Supplementary material for: LncRNA MIR200CHG inhibits EMT in gastric cancer by stabilizing miR-200c from target-directed miRNA degradation
Source: PubMed Central journal article supplement (PMC10709323; doi:10.1038/s41467-023-43974-w), 2023-12-08
Supplement: 41467_2023_43974_MOESM3_ESM.pdf [file 41467_2023_43974_MOESM3_ESM.pdf]

## **Description of Additional Supplementary Files**

### **File name: Supplementary Data 1**

**Description:** Top differentially expressed mRNAs ( $|\log_2FC| > 0.5$ , BH-adjusted  $P < 1 \times 10^{-5}$ ) between the MSS/EMT subtype and non-MSS/EMT subtypes in the TCGA cohort.  $P$ -values were determined by moderated two-sided  $t$ -tests and adjusted for multiple testing.

### **File name: Supplementary Data 2**

**Description:** Demographic and clinical characteristics of gastric cancer patients.

### **File name: Supplementary Data 3**

**Description:** Interacted molecules of MIR200CHG predicted by the ENCORI database.
